# Supplementary material for: Computational Study of Helicase from SARS-CoV-2 in RNA-Free and Engaged Form
Source: MDPI journal article supplement (doi:10.3390/ijms232314721), 2022-11-25
Supplement: s1 [file s1]

# Computational study of helicase from SARS-CoV-2 in RNA-free and engaged form

Francesca Di Matteo,<sup>1</sup> Giorgia Frumenzio,<sup>2</sup> Balasubramanian Chandramouli,<sup>2</sup> Alessandro Grottesi,<sup>3</sup>  
Andrew Emerson,<sup>2</sup> and Francesco Musiani<sup>1,\*</sup>

1 Laboratory of Bioinorganic Chemistry, Department of Pharmacy and Biotechnology, University of Bologna, Viale G. Fanin 40, Bologna, 40127, Italy.

2 Super Computing Applications and Innovation, Department HPC, CINECA, via Magnanelli 6/3, Casalecchio di Reno, 40033, BO, Italy.

3 Department HPC, CINECA, via dei Tizii 6, Roma, 00185, Italy.

\* Corresponding author: francesco.musiani@unibo.it

## SUPPLEMENTARY INFORMATION

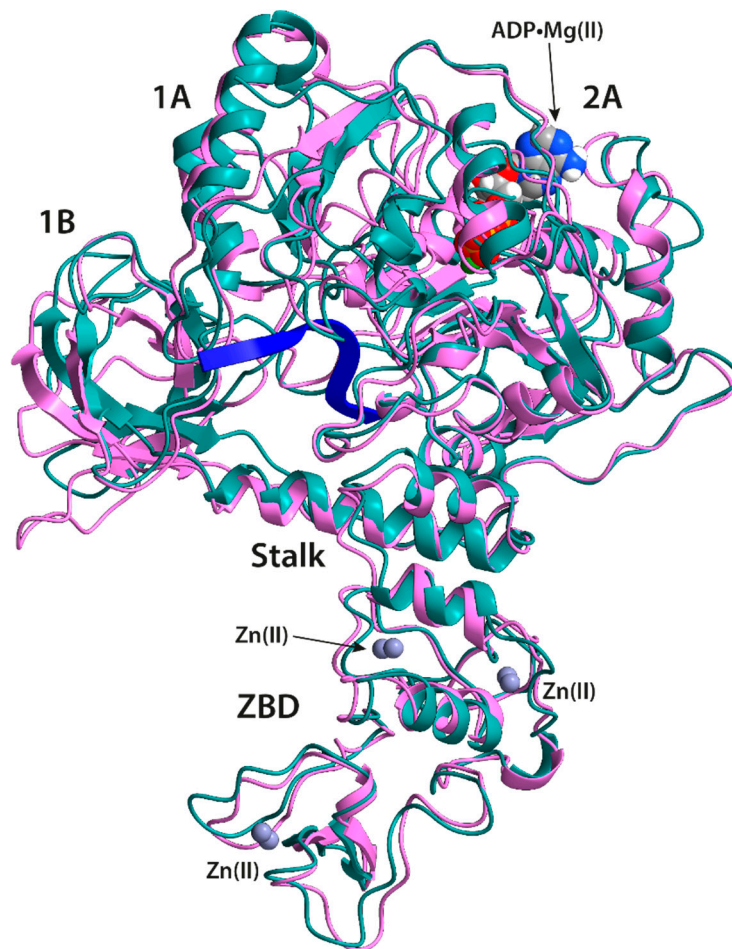

**Figure S1.** Superimposition of NSP13 initial structures in the RNA-free (dark cyan ribbons) and RNA-engaged (orchid ribbons) form. The RNA fragment is reported as a blue ribbon. The Zn(II) and Mg(II) ions as well as the ADP molecule are reported as spheres colored according to the atom type.

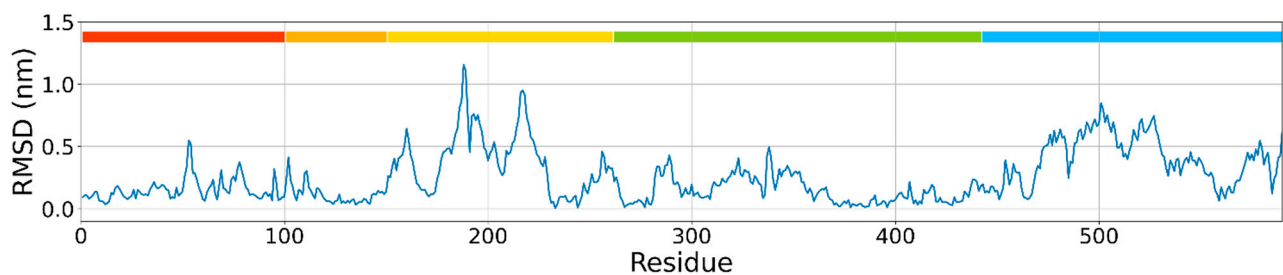

**Figure S2.** Calculated per residue Cα root mean square deviations (RMSD) of NSP13 between the RNA-free and RNA-engaged initial structures. The horizontal bars report the position of each domain in the sequence and are colored according to the domain coloration in Figure 1C.

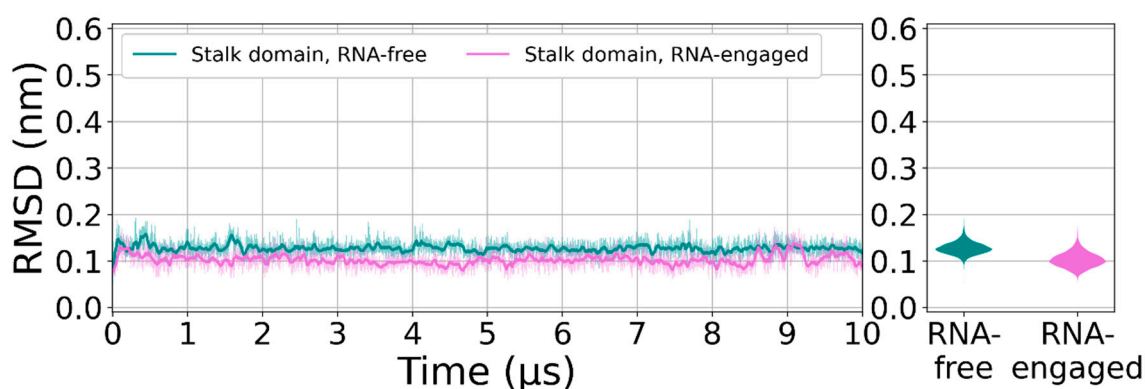

**Figure S3.** Calculated root mean square deviations (RMSD) of Stalk domain from the initial structures plotted as a function of the simulation time. RMSD values for Stalk domain in the RNA-free and in the RNA-engaged form are in dark cyan and orchid, respectively. The bold lines are obtained by applying a Savitzky-Golay filter in order to cut-off the noise. In the right panel, the violin representation of the RMSD distribution is provided.

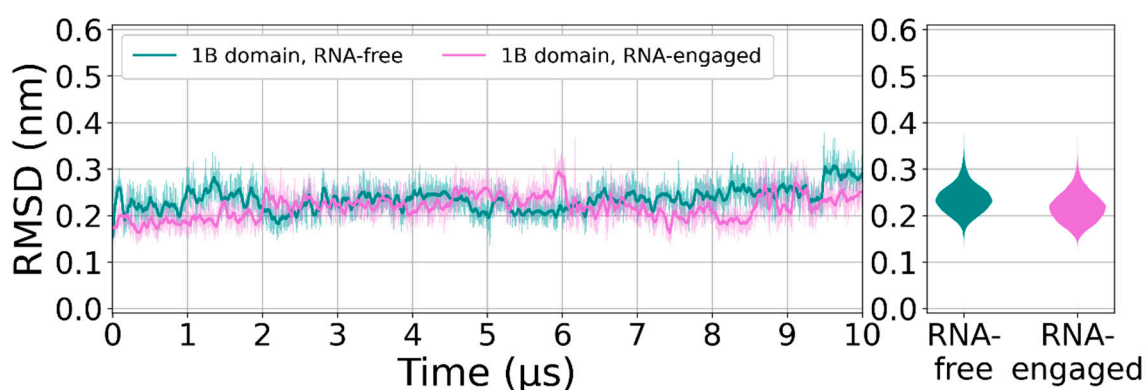

**Figure S4.** Calculated root mean square deviations (RMSD) of 1B domain from the initial structures plotted as a function of the simulation time. RMSD values for 1B domain in the RNA-free and in the RNA-engaged form are in dark cyan and orchid, respectively. The bold lines are obtained by applying a Savitzky-Golay filter in order to cut-off the noise. In the right panel, the violin representation of the RMSD distribution is provided.

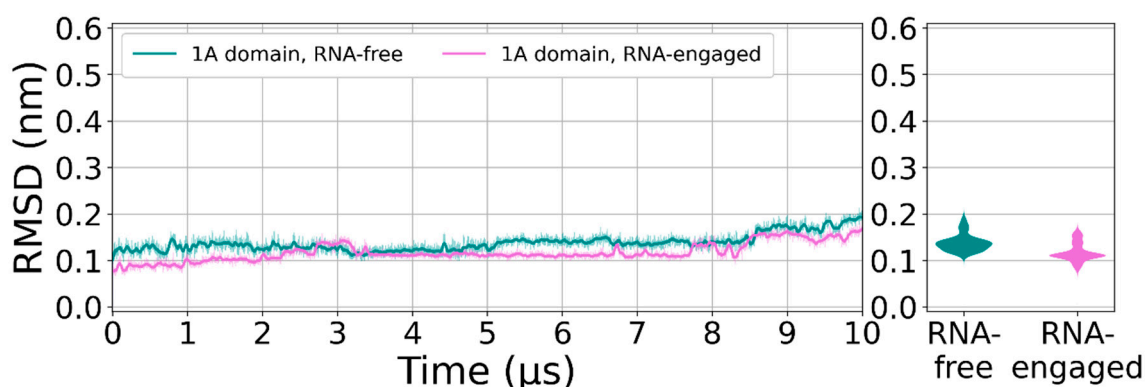

**Figure S5.** Calculated root mean square deviations (RMSD) of 1A domain from the initial structures plotted as a function of the simulation time. RMSD values for 1A domain in the RNA-free and in the RNA-engaged form are in dark cyan and orchid, respectively. The bold lines are obtained by applying a Savitzky-Golay filter in order to cut-off the noise. In the right panel, the violin representation of the RMSD distribution is provided.

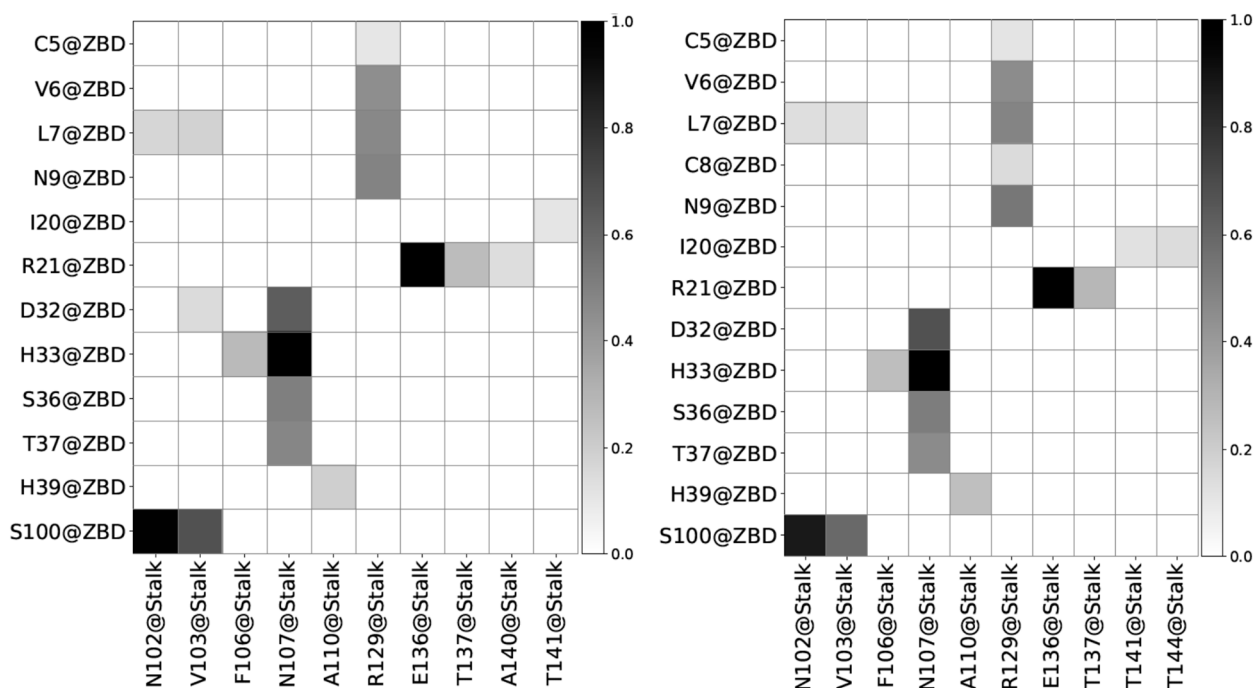

**Figure S6.** Plot of the interface contact matrix between domains ZBD and Stalk in the RNA-free (left panel) and RNA-engaged (right panel) nsp13. Contacts are colored from white to black if they are observed in the 0% or 100% of the simulation time, respectively.

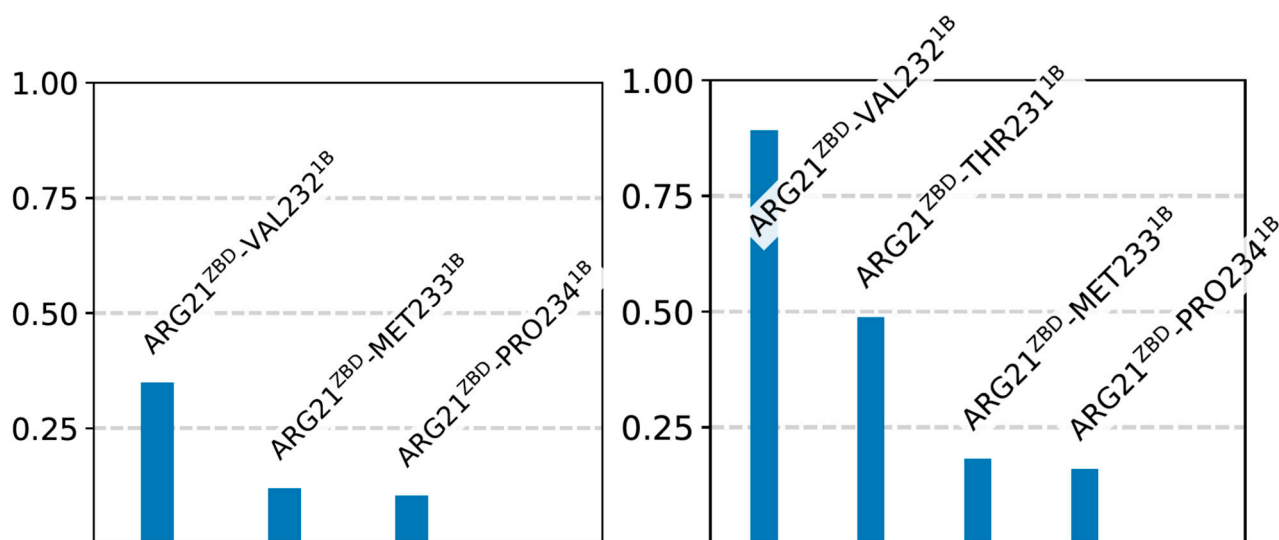

**Figure S7.** Contact frequencies between domains ZBD and 1B in the RNA-free (left panel) and RNA-engaged (right panel) nsp13. Bar heights are proportional to the relative contact time observed during the simulations.

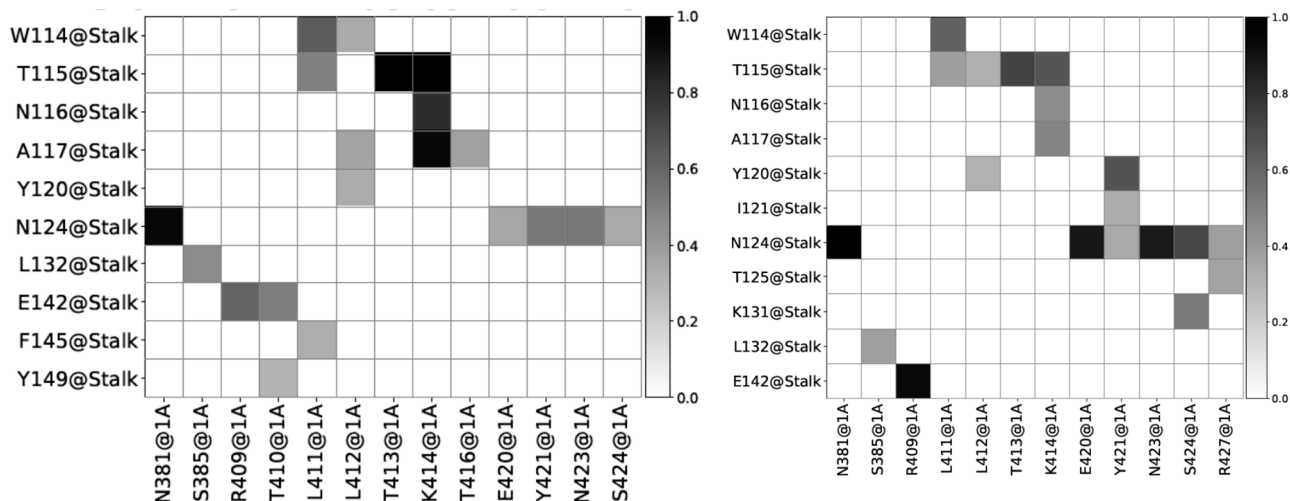

**Figure S8.** Plot of the interface contact matrix between domains Stalk and 1A in the RNA-free (left panel) and RNA-engaged (right panel) nspl3. Contacts are colored from white to black if they are observed in the 0% or 100% of the simulation time, respectively.

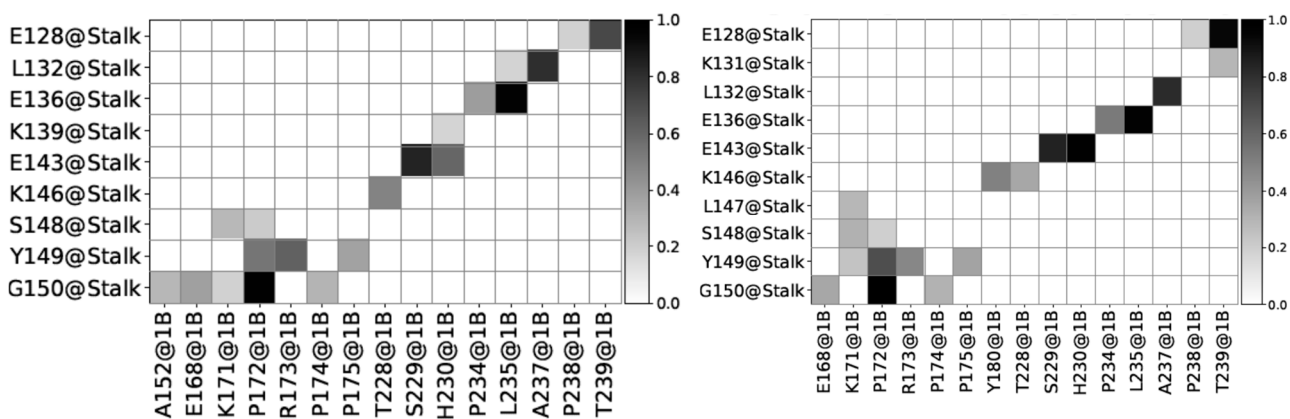

**Figure S9.** Plot of the interface contact matrix between domains Stalk and 1B in the RNA-free (left panel) and RNA-engaged (right panel) nspl3. Contacts are colored from white to black if they are observed in the 0% or 100% of the simulation time, respectively.

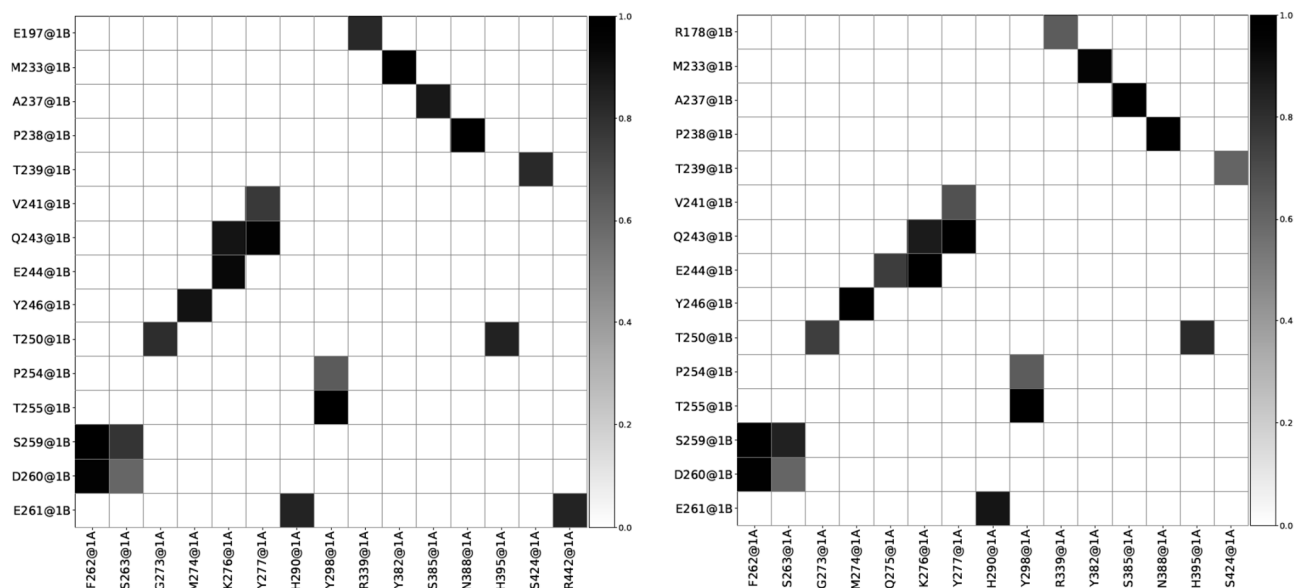

**Figure S10.** Plot of the interface contact matrix between domains 1A and 1B in the RNA-free (left panel) and RNA-engaged (right panel) nsP13. Contacts are colored from white to black if they are observed in the 0% or 100% of the simulation time, respectively.
